# Supplementary material
Source: PubMed Central journal article supplement (PMC8061635)
Supplement: mmc1.pdf [file mmc1.pdf]

**Supplementary Table 1a. SARS-CoV-2 RNA loads in duplicate nasopharyngeal samples on one day.**

| <b>Patient</b> | <b>Sample A*</b> | <b>Sample B*</b> |
|----------------|------------------|------------------|
| A              | 3.9              | 6.2              |
| B              | Negative         | Negative         |
| C              | Negative         | Negative         |
| D              | Negative         | Negative         |
| E              | 3.6              | 4.6              |
| F              | 3.6              | 1.7              |
| G              | 2.6              | 2.6              |
| H              | 1.7              | 2.3              |

\*Load in log copies/ml.

**Supplementary Table 1b. SARS-CoV-2 RNA loads in duplicate/ triplicate sputum samples on one day.**

| <b>Patient</b> | <b>Sample A*</b> | <b>Sample B*</b> | <b>Sample C*</b> |
|----------------|------------------|------------------|------------------|
| A              | 7.8              | 5.2              | -                |
| C              | Negative         | 0.4              | -                |
| I              | 3.6              | 3.9              | -                |
| J              | Negative         | 3.6              | -                |
| K              | 3.0              | 3.6              | -                |
| L              | 0.4              | Negative         | -                |
| M              | 4.6              | 5.2              | -                |
| N              | 5.6              | 7.2              | -                |
| O              | 2.6              | 3.0              | Negative         |
| P              | 6.2              | 2.0              | 5.6              |

\*Load in log copies/ml.
